# Supplementary material
Source: HighWire-hosted journal article supplement (https://rapm.bmj.com/content/rapm-2021-103007)
Supplement: inline-supplementary-material-3 [file inline-supplementary-material-3.pdf]

## Appendix C Subjective Opiate Withdrawal Scale (SOWS)

Name: \_\_\_\_\_

DOB: \_\_\_\_\_

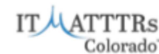

### Subjective Opiate Withdrawal Scale (SOWS)

Instructions: We want to know how you're feeling. In the column below today's date and time, use the scale to write in a number from 0-4 about how you feel about each symptom right now.

Scale: 0 = not at all      1 = a little      2 = moderately      3 = quite a bit      4 = extremely

| DATE    |                           |       |       |       |       |       |
|---------|---------------------------|-------|-------|-------|-------|-------|
| TIME    |                           |       |       |       |       |       |
| SYMPTOM |                           | SCORE | SCORE | SCORE | SCORE | SCORE |
| 1       | I feel anxious            |       |       |       |       |       |
| 2       | I feel like yawning       |       |       |       |       |       |
| 3       | I am perspiring           |       |       |       |       |       |
| 4       | My eyes are tearing       |       |       |       |       |       |
| 5       | My nose is running        |       |       |       |       |       |
| 6       | I have goosebumps         |       |       |       |       |       |
| 7       | I am shaking              |       |       |       |       |       |
| 8       | I have hot flushes        |       |       |       |       |       |
| 9       | I have cold flushes       |       |       |       |       |       |
| 10      | My bones and muscles ache |       |       |       |       |       |
| 11      | I feel restless           |       |       |       |       |       |
| 12      | I feel nauseous           |       |       |       |       |       |
| 13      | I feel like vomiting      |       |       |       |       |       |
| 14      | My muscles twitch         |       |       |       |       |       |
| 15      | I have stomach cramps     |       |       |       |       |       |
| 16      | I feel like using now     |       |       |       |       |       |
| TOTAL   |                           |       |       |       |       |       |

Mild Withdrawal = score of 1 – 10

Moderate withdrawal = 11 – 20

Severe withdrawal = 21 – 30

Source: Reprinted from Handelsman et al. 1987, p. 296, by courtesy of Marcel Dekker, Inc. . For use outside of IT MATTRs Colorado, please contact [IMATTRsColorado@boulder.edu](mailto:IMATTRsColorado@boulder.edu)
